# Supplementary material
Source: PubMed Central journal article supplement (PMC2491372)
Supplement: JCI0834780sd.pdf [file JCI0834780sd.pdf]

# Supplemental Figure 1: Bioluminescence is proportional to cell number

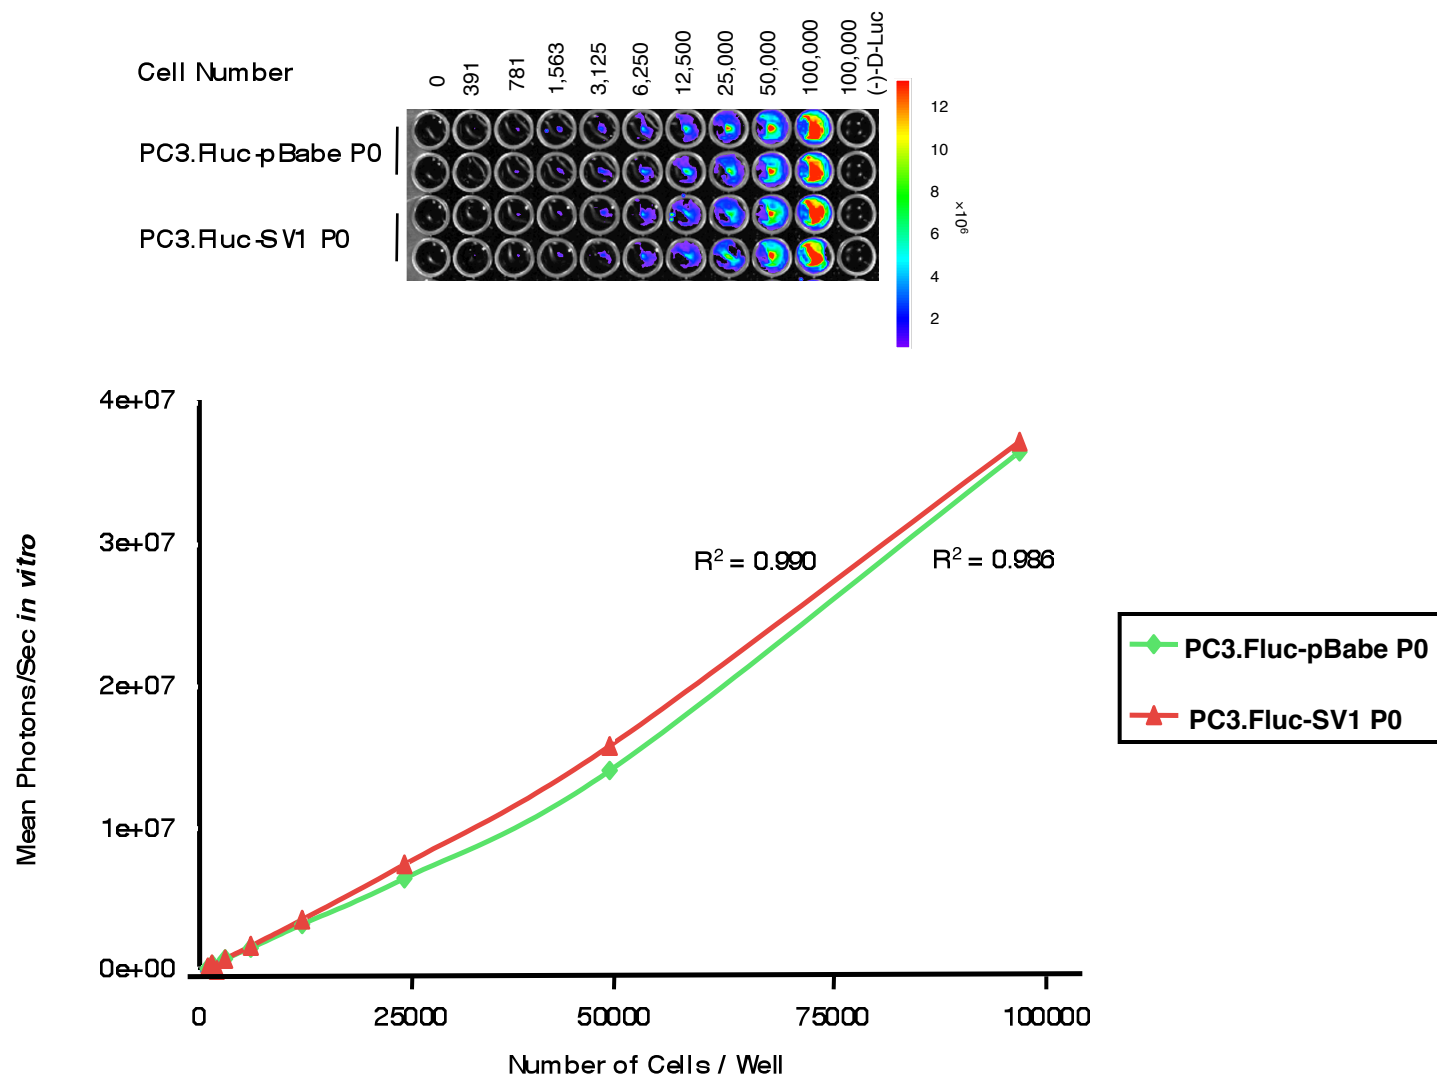

## **Supplemental Figure 1**

In vitro bioluminescence of human prostate PC-3 sublines; Control and SV1 overexpression cells. Cells from each subline were serially diluted in duplicate wells from 100,000 to 391 cells/well. D-luciferin substrate (150 mg/ml) was added to each well and the plate was imaged to obtain photons/second. Wells with media (no cells) or cells alone (no D-luciferin) were included as controls. Numbers of photons emitted per well per second were determined and plotted relative to cell numbers. An exponential increase of bioluminescent signal that corresponds with the number of seeded cells is observed.
